# Supplementary material for: The genome of the basal agaricomycete Xanthophyllomyces dendrorhous provides insights into the organization of its acetyl-CoA derived pathways and the evolution of Agaricomycotina
Source: PubMed Central journal article supplement (PMC4393869; doi:10.1186/s12864-015-1380-0), 2015-03-25
Supplement: 12864_2015_1380_MOESM1_ESM.pdf [file 12864_2015_1380_MOESM1_ESM.pdf]

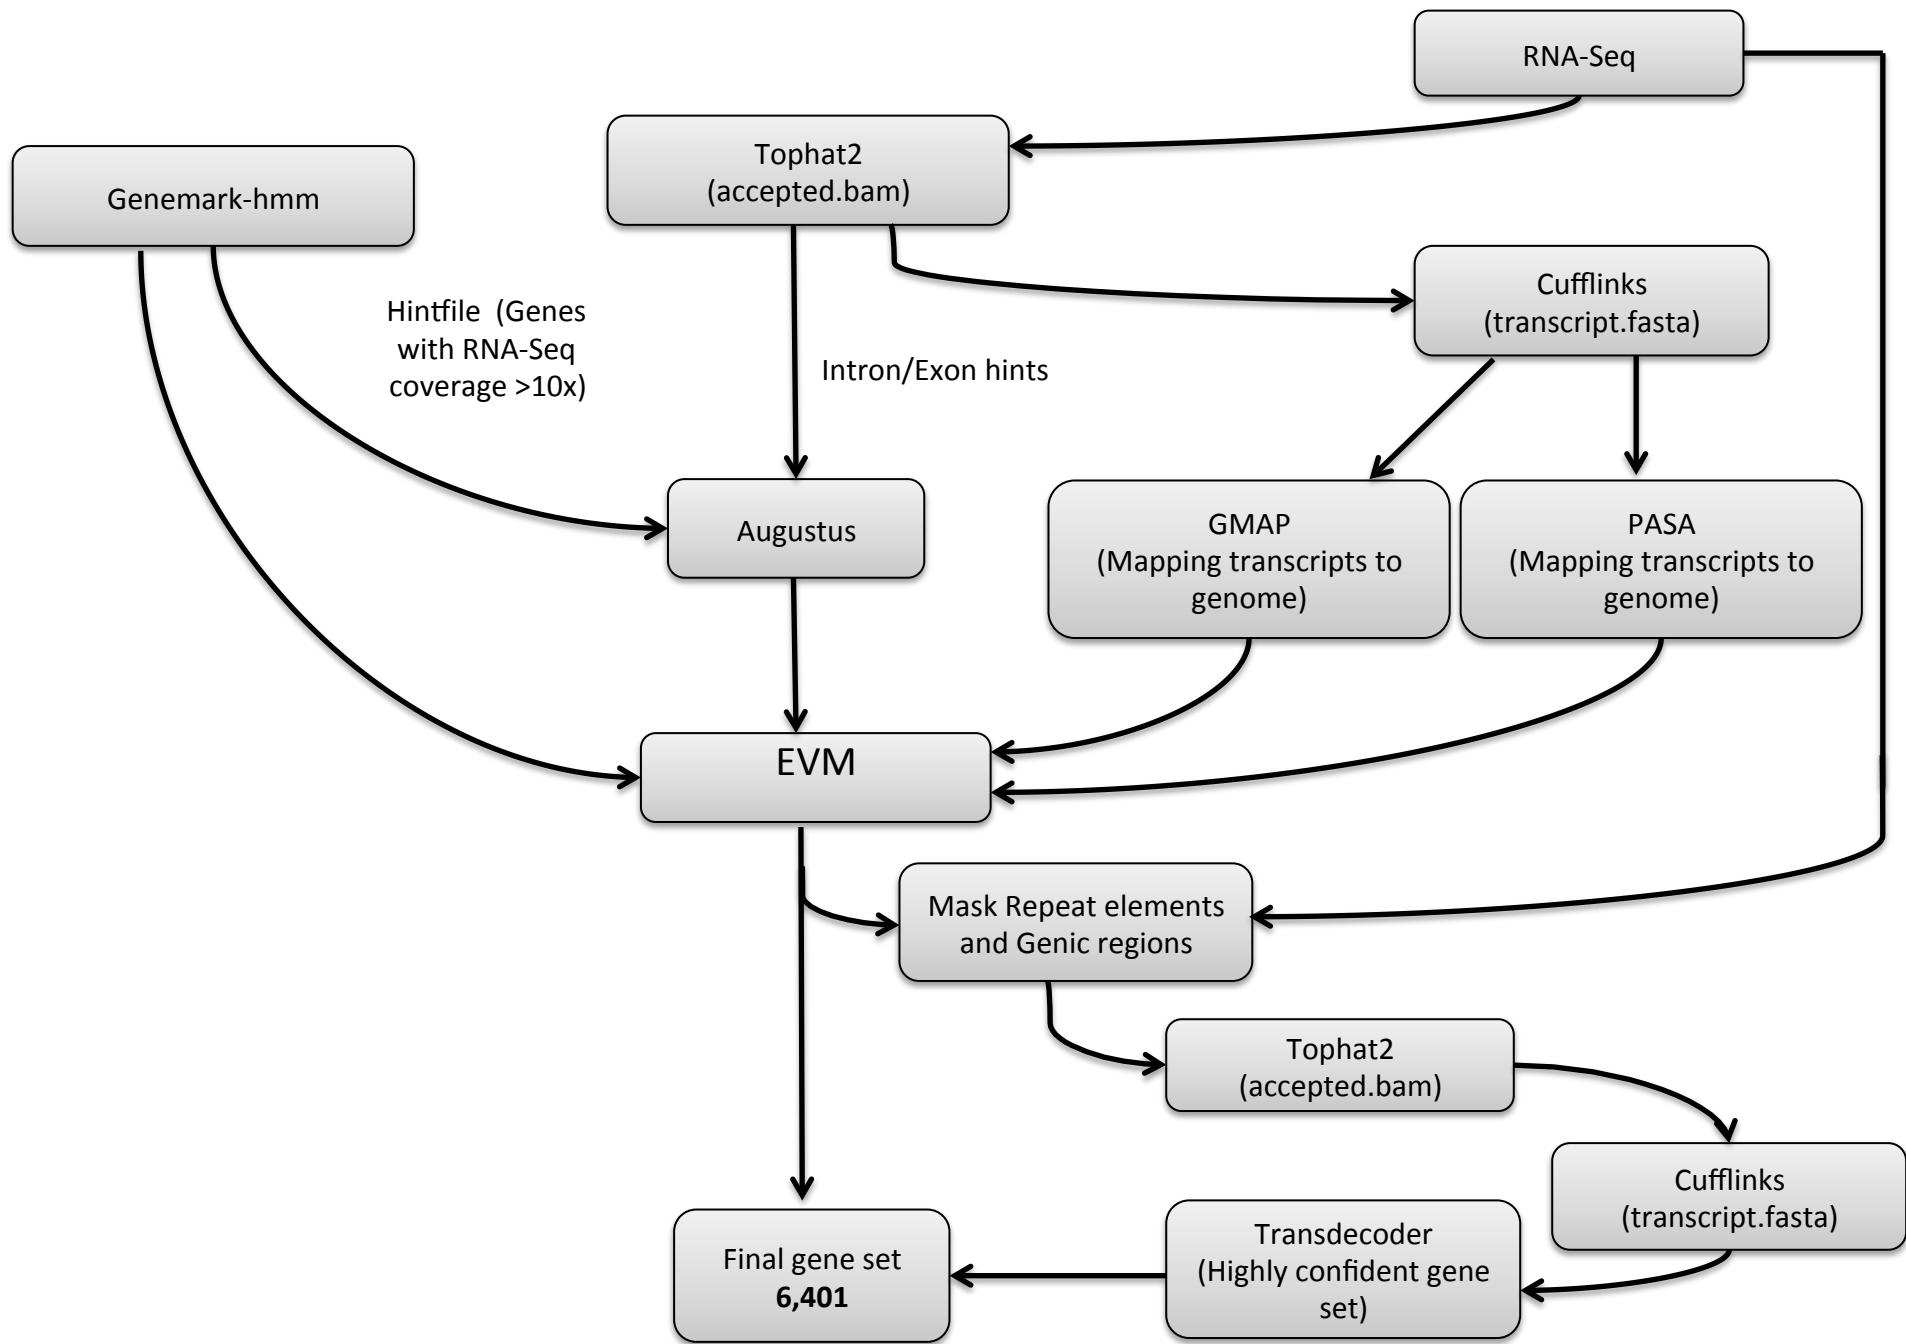

Supplementary Figure 1: Gene prediction pipeline used for predicting genes within the genome of *X. dendrorhous*.

**Supplementary Table 1: Secondary metabolite clusters predicted within the genome of *X. dendrorhous*.**

**Cluster:1**

| <b>Backbone_gene_id</b> | <b>Gene_id</b> | <b>Gene_positions</b> | <b>Chromosome-Contig</b> | <b>Gene_order</b> | <b>5'end</b> | <b>3'end</b> | <b>Gene_distance</b> | <b>Domain_score</b> |
|-------------------------|----------------|-----------------------|--------------------------|-------------------|--------------|--------------|----------------------|---------------------|
| XDEN_04041              | XDEN_04042     | -1                    | 54                       | 241               | 740866       | 744314       | 541                  | 1                   |
| XDEN_04041              | XDEN_04041     | 0                     | 54                       | 240               | 733506       | 740325       | 0                    | 1                   |
| XDEN_04041              | XDEN_04040     | 1                     | 54                       | 239               | 731589       | 733193       | 313                  | 0                   |
| XDEN_04041              | XDEN_04039     | 2                     | 54                       | 238               | 727989       | 730753       | 836                  | 1                   |
| XDEN_04041              | XDEN_04038     | 3                     | 54                       | 237               | 726536       | 727498       | 491                  | 0                   |
| XDEN_04041              | XDEN_04037     | 4                     | 54                       | 236               | 723179       | 726257       | 279                  | 1                   |
| XDEN_04041              | XDEN_04036     | 5                     | 54                       | 235               | 720173       | 722704       | 475                  | 0                   |
| XDEN_04041              | XDEN_04035     | 6                     | 54                       | 234               | 711884       | 719170       | 1003                 | 1                   |
| XDEN_04041              | XDEN_04034     | 7                     | 54                       | 233               | 706419       | 710916       | 968                  | 0                   |
| XDEN_04041              | XDEN_04033     | 8                     | 54                       | 232               | 704246       | 705780       | 639                  | 0                   |
| XDEN_04041              | XDEN_04032     | 9                     | 54                       | 231               | 702306       | 704043       | 203                  | 1                   |
| XDEN_04041              | XDEN_04031     | 10                    | 54                       | 230               | 701197       | 702001       | 305                  | 0                   |
| XDEN_04041              | XDEN_04030     | 11                    | 54                       | 229               | 699396       | 700978       | 219                  | 0                   |
| XDEN_04041              | XDEN_04029     | 12                    | 54                       | 228               | 697265       | 699076       | 320                  | 1                   |
| XDEN_04041              | XDEN_04028     | 13                    | 54                       | 227               | 692878       | 695960       | 1305                 | 1                   |
| XDEN_04041              | XDEN_06315     | 14                    | 54                       | 226               | 691217       | 692606       | 272                  | 0                   |
| XDEN_04041              | XDEN_04027     | 15                    | 54                       | 225               | 688706       | 691035       | 182                  | 1                   |

**Cluster:2**

| <b>Backbone_gene_id</b> | <b>Gene_id</b> | <b>Gene_positions</b> | <b>Chromosome-Contig</b> | <b>Gene_order</b> | <b>5'end</b> | <b>3'end</b> | <b>Gene_distance</b> | <b>Domain_score</b> |
|-------------------------|----------------|-----------------------|--------------------------|-------------------|--------------|--------------|----------------------|---------------------|
| XDEN_06121              | XDEN_06131     | -10                   | 79                       | 695               | 2062902      | 2064575      | 357                  | 0                   |
| XDEN_06121              | XDEN_06130     | -9                    | 79                       | 694               | 2061014      | 2062545      | 778                  | 1                   |
| XDEN_06121              | XDEN_06129     | -8                    | 79                       | 693               | 2059803      | 2060236      | 501                  | 0                   |
| XDEN_06121              | XDEN_06128     | -7                    | 79                       | 692               | 2057630      | 2059302      | 697                  | 1                   |
| XDEN_06121              | XDEN_06127     | -6                    | 79                       | 691               | 2052204      | 2056933      | 859                  | 0                   |
| XDEN_06121              | XDEN_06126     | -5                    | 79                       | 690               | 2050708      | 2051345      | 246                  | 0                   |
| XDEN_06121              | XDEN_06125     | -4                    | 79                       | 689               | 2049048      | 2050462      | 418                  | 0                   |
| XDEN_06121              | XDEN_06124     | -3                    | 79                       | 688               | 2047721      | 2048630      | 456                  | 0                   |

|            |            |    |    |     |         |         |      |   |
|------------|------------|----|----|-----|---------|---------|------|---|
| XDEN_06121 | XDEN_06123 | -2 | 79 | 687 | 2045652 | 2047265 | 469  | 0 |
| XDEN_06121 | XDEN_06122 | -1 | 79 | 686 | 2044728 | 2045183 | 295  | 0 |
| XDEN_06121 | XDEN_06121 | 0  | 79 | 685 | 2040016 | 2044433 | 0    | 1 |
| XDEN_06121 | XDEN_06120 | 1  | 79 | 684 | 2038248 | 2039550 | 466  | 0 |
| XDEN_06121 | XDEN_06119 | 2  | 79 | 683 | 2035799 | 2037908 | 340  | 1 |
| XDEN_06121 | XDEN_06118 | 3  | 79 | 682 | 2032319 | 2033759 | 2040 | 0 |
| XDEN_06121 | XDEN_06117 | 4  | 79 | 681 | 2029048 | 2032016 | 303  | 1 |
| XDEN_06121 | XDEN_06116 | 5  | 79 | 680 | 2027516 | 2028720 | 328  | 1 |
| XDEN_06121 | XDEN_06115 | 6  | 79 | 679 | 2023522 | 2027484 | 32   | 1 |
| XDEN_06121 | XDEN_06114 | 7  | 79 | 678 | 2019987 | 2023027 | 495  | 0 |
| XDEN_06121 | XDEN_06113 | 8  | 79 | 677 | 2018817 | 2019767 | 220  | 0 |
| XDEN_06121 | XDEN_06112 | 9  | 79 | 676 | 2017106 | 2018316 | 501  | 0 |
| XDEN_06121 | XDEN_06111 | 10 | 79 | 675 | 2014526 | 2017015 | 91   | 0 |
| XDEN_06121 | XDEN_06110 | 11 | 79 | 674 | 2012525 | 2013825 | 701  | 0 |
| XDEN_06121 | XDEN_06109 | 12 | 79 | 673 | 2011746 | 2012307 | 218  | 0 |
| XDEN_06121 | XDEN_06108 | 13 | 79 | 672 | 2008849 | 2011495 | 251  | 1 |
| XDEN_06121 | XDEN_06107 | 14 | 79 | 671 | 2006362 | 2008318 | 531  | 0 |
| XDEN_06121 | XDEN_06106 | 15 | 79 | 670 | 2002723 | 2005517 | 845  | 1 |

**Supplementary Table 2: Backbone genes of the two secondary metabolite clusters predicted within the genome of *X. dendrorhous*.**

| <b>Backbone_gene_id</b> | <b>Scaffold id</b> | <b>Gene_order</b> | <b>5'_end</b> | <b>3'_end</b> | <b>SMURF_backbone_gene_prediction</b> |
|-------------------------|--------------------|-------------------|---------------|---------------|---------------------------------------|
| XDEN_00460              | 162                | 343               | 1032809       | 1037153       | NRPS-Like                             |
| XDEN_04041              | 54                 | 240               | 733506        | 740325        | PKS-Like                              |
| XDEN_06121              | 79                 | 685               | 2040016       | 2044433       | NRPS-Like                             |

**Supplementary Table 3: List of fungal genomes used for phylogenetic analyses.**

|    | Species names                        | Taxonomy*                                                                                             | Reference |
|----|--------------------------------------|-------------------------------------------------------------------------------------------------------|-----------|
| 1  | <i>Melampsora laricis</i>            | Basidiomycota; Pucciniomycotina;<br>Pucciniomycetes; Pucciniales;                                     | [1]       |
| 2  | <i>Puccinia graminis</i>             | Basidiomycota; Pucciniomycotina;<br>Pucciniomycetes; Pucciniales;                                     | [1]       |
| 3  | <i>Mixia osmundae</i>                | Basidiomycota; Pucciniomycotina;<br>Mixiomycetes; Mixiales;                                           | [2]       |
| 4  | <i>Malassezia sympodialis</i>        | Basidiomycota; Ustilaginomycotina;<br>Malasseziomycetes; Malasseziales                                | [3]       |
| 5  | <i>Pseudozyma antarctica</i>         | Basidiomycota; Ustilaginomycotina;<br>Ustilaginomycetes; Ustilaginales;                               | [4]       |
| 6  | <i>Pseudozyma hubeiensis</i>         | Basidiomycota; Ustilaginomycotina;<br>Ustilaginomycetes; Ustilaginales;                               | [5]       |
| 7  | <i>Ustilago maydis</i>               | Basidiomycota; Ustilaginomycotina;<br>Ustilaginomycetes; Ustilaginales;                               | [6]       |
| 8  | <i>Ustilago hordei</i>               | Basidiomycota; Ustilaginomycotina;<br>Ustilaginomycetes; Ustilaginales;                               | [7]       |
| 9  | <i>Malassezia globosa</i>            | Basidiomycota; Ustilaginomycotina;<br>Malasseziomycetes; Malasseziales;                               | [8]       |
| 10 | <i>Sporisorium reilianum</i>         | Basidiomycota; Ustilaginomycotina;<br>Ustilaginomycetes; Ustilaginales;                               | [9]       |
| 11 | <i>Melanopsichium pennsylvanicum</i> | Basidiomycota; Ustilaginomycotina;<br>Ustilaginomycetes; Ustilaginales;                               | [10]      |
| 12 | <i>Auricularia subglabra</i>         | Basidiomycota; Agaricomycotina;<br>Agaricomycetes; Agaricomycetes incertae sedis;<br>Auriculariales;  | [11]      |
| 13 | <i>Coniophora puteana</i>            | Basidiomycota; Agaricomycotina;<br>Agaricomycetes; Agaricomycetidae; Boletales;                       | [11]      |
| 14 | <i>Dichomitus squalens</i>           | Basidiomycota; Agaricomycotina;<br>Agaricomycetes; Agaricomycetes incertae sedis;<br>Polyporales;     | [11]      |
| 15 | <i>Fomitiporia mediterranea</i>      | Basidiomycota; Agaricomycotina;<br>Agaricomycetes; Agaricomycetes incertae sedis;<br>Hymenochaetales; | [11]      |
| 16 | <i>Gloeophyllum trabeum</i>          | Basidiomycota; Agaricomycotina;<br>Agaricomycetes; Agaricomycetes incertae sedis;<br>Gloeophyllales;  | [11]      |
| 17 | <i>Punctularia strigosozonata</i>    | Basidiomycota; Agaricomycotina;<br>Agaricomycetes; Agaricomycetes incertae sedis;<br>Corticiales;     | [11]      |
| 18 | <i>Stereum hirsutum</i>              | Basidiomycota; Agaricomycotina;<br>Agaricomycetes; Agaricomycetes incertae sedis;<br>Russulales;      | [11]      |
| 19 | <i>Trametes versicolor</i>           | Basidiomycota; Agaricomycotina;<br>Agaricomycetes; Agaricomycetes incertae sedis;<br>Polyporales;     | [11]      |
| 20 | <i>Tremella mesenterica</i>          | Basidiomycota; Agaricomycotina;<br>Tremellomycetes; Tremellales;                                      | [11]      |
| 21 | <i>Wolfiporia cocos</i>              | Basidiomycota; Agaricomycotina;<br>Agaricomycetes; Agaricomycetes incertae sedis;                     | [11]      |

|    |                                    |                                                                                                                                       |      |
|----|------------------------------------|---------------------------------------------------------------------------------------------------------------------------------------|------|
|    |                                    | Polyporales;                                                                                                                          |      |
| 22 | <i>Dacryopinax sp.</i>             | Basidiomycota; Agaricomycotina;<br>Dacrymycetes; Dacrymycetales;                                                                      | [11] |
| 23 | <i>Cryptococcus neoformans</i>     | Basidiomycota; Agaricomycotina;<br>Tremellomycetes; Tremellales;                                                                      | [12] |
| 24 | <i>Heterobasidion irregulare</i>   | Basidiomycota; Agaricomycotina;<br>Agaricomycetes; Agaricomycetes incertae sedis;<br>Russulales;                                      | [13] |
| 25 | <i>Laccaria bicolor</i>            | Basidiomycota; Agaricomycotina;<br>Agaricomycetes; Agaricomycetidae; Agaricales;                                                      | [14] |
| 26 | <i>Armillaria mellea</i>           | Basidiomycota; Agaricomycotina;<br>Agaricomycetes; Agaricomycetidae; Agaricales;                                                      | [15] |
| 27 | <i>Coprinopsis cinerea</i>         | Basidiomycota; Agaricomycotina;<br>Agaricomycetes; Agaricomycetidae; Agaricales;                                                      | [16] |
| 28 | <i>Phanerochaete chrysosporium</i> | Basidiomycota; Agaricomycotina;<br>Agaricomycetes; Agaricomycetes incertae sedis;<br>Polyporales;                                     | [17] |
| 29 | <i>Schizophyllum commune</i>       | Basidiomycota; Agaricomycotina;<br>Agaricomycetes; Agaricomycetidae; Agaricales;                                                      | [18] |
| 30 | <i>Wallemia sebi</i>               | Basidiomycota; Basidiomycota incertae sedis;<br>Wallemiomycetes; Wallemiales;                                                         | [19] |
| 31 | <i>Wallemia ichthyophaga</i>       | Basidiomycota; Basidiomycota incertae sedis;<br>Wallemiomycetes; Wallemiales;                                                         | [20] |
| 32 | <i>Aspergillus fumigatus</i>       | Ascomycota; saccharomyceta; Pezizomycotina;<br>leotiomyceta; Eurotiomycetes;<br>Eurotiomycetidae; Eurotiales;                         | [21] |
| 33 | <i>Saccharomyces cerevisiae</i>    | Ascomycota; saccharomyceta;<br>Saccharomycotina; Saccharomycetes;<br>Saccharomycetales;                                               | [22] |
| 34 | <i>Schizosaccharomyces pombe</i>   | Ascomycota; Taphrinomycotina;<br>Schizosaccharomycetes;<br>Schizosaccharomycetales;                                                   | [23] |
| 35 | <i>Stagonospora nodorum</i>        | Ascomycota; saccharomyceta; Pezizomycotina;<br>leotiomyceta; dothideomyceta;<br>Dothideomycetes; Pleosporomycetidae;<br>Pleosporales; | [24] |
| 36 | <i>Trichoderma reesei</i>          | Ascomycota; saccharomyceta; Pezizomycotina;<br>leotiomyceta; sordariomyceta; Sordariomycetes;<br>Hypocreomycetidae; Hypocreales;      | [25] |
| 37 | <i>Yarrowia lipolytica</i>         | Ascomycota; saccharomyceta;<br>Saccharomycotina; Saccharomycetes;<br>Saccharomycetales;                                               | [26] |
| 38 | <i>Aspergillus nidulans</i>        | Ascomycota; saccharomyceta; Pezizomycotina;<br>leotiomyceta; Eurotiomycetes;<br>Eurotiomycetidae; Eurotiales;                         | [27] |
| 39 | <i>Candida albicans</i>            | Ascomycota; saccharomyceta;<br>Saccharomycotina; Saccharomycetes;<br>Saccharomycetales;                                               | [28] |
| 40 | <i>Aspergillus niger</i>           | Ascomycota; saccharomyceta; Pezizomycotina;<br>leotiomyceta; Eurotiomycetes;<br>Eurotiomycetidae; Eurotiales;                         | [29] |
| 41 | <i>Debaryomyces hansenii</i>       | Ascomycota; saccharomyceta;<br>Saccharomycotina; Saccharomycetes;                                                                     | [26] |

|    |                                       |                                                                                                                                     |                        |
|----|---------------------------------------|-------------------------------------------------------------------------------------------------------------------------------------|------------------------|
|    |                                       | Saccharomycetales;                                                                                                                  |                        |
| 42 | <i>Kluyveromyces waltii</i>           | Ascomycota; saccharomyceta;<br>Saccharomycotina; Saccharomycetes;<br>Saccharomycetales;                                             | [30]                   |
| 43 | <i>Ashbya gossypii</i>                | Ascomycota; saccharomyceta;<br>Saccharomycotina; Saccharomycetes;<br>Saccharomycetales;                                             | [31]                   |
| 44 | <i>Magnaporthe grisea</i>             | Ascomycota; saccharomyceta; Pezizomycotina;<br>leotiomyceta; sordariomyceta; Sordariomycetes;<br>Sordariomycetidae; Magnaporthales; | [32]                   |
| 45 | <i>Neurospora crassa</i>              | Ascomycota; saccharomyceta; Pezizomycotina;<br>leotiomyceta; sordariomyceta; Sordariomycetes;<br>Sordariomycetidae; Sordariales;    | [33]                   |
| 46 | <i>Batrachochytrium dendrobatidis</i> | Chytridiomycota; Chytridiomycetes;<br>Rhizophydiales;                                                                               | Broad-Mit <sup>a</sup> |
| 47 | <i>Rhizopus oryzae</i>                | Fungi incertae sedis; Early diverging fungal<br>lineages; Mucoromycotina; Mucorales;                                                | [34]                   |

\* Information extracted from NCBI Taxonomy Browser.

<sup>a</sup> Broad-FGI, MIT/Harvard Broad Institute, funded through the Fungal Genome Initiative;

## References

- Duplessis S, Cuomo CA, Lin YC, Aerts A, Tisserant E, Veneault-Fourrey C, Joly DL, Hacquard S, Amsellem J, Cantarel BL *et al*: **Obligate biotrophy features unraveled by the genomic analysis of rust fungi.** *Proceedings of the National Academy of Sciences of the United States of America* 2011, **108**(22):9166-9171.
- Toome M, Ohm RA, Riley RW, James TY, Lazarus KL, Henrissat B, Albu S, Boyd A, Chow J, Clum A *et al*: **Genome sequencing provides insight into the reproductive biology, nutritional mode and ploidy of the fern pathogen *Mixia osmundae*.** *The New phytologist* 2014, **202**(2):554-564.
- Gioti A, Nystedt B, Li W, Xu J, Andersson A, Averette AF, Munch K, Wang X, Kappauf C, Kingsbury JM *et al*: **Genomic insights into the atopic eczema-associated skin commensal yeast *Malassezia sympodialis*.** *mBio* 2013, **4**(1):e00572-00512.
- Morita T, Koike H, Hagiwara H, Ito E, Machida M, Sato S, Habe H, Kitamoto D: **Genome and transcriptome analysis of the basidiomycetous yeast *Pseudozyma antarctica* producing extracellular glycolipids, mannosylerythritol lipids.** *PLoS one* 2014, **9**(2):e86490.
- Konishi M, Hatada Y, Horiuchi J: **Draft Genome Sequence of the Basidiomycetous Yeast-Like Fungus *Pseudozyma hubeiensis* SY62, Which Produces an Abundant Amount of the Biosurfactant Mannosylerythritol Lipids.** *Genome announcements* 2013, **1**(4).
- Kämper J, Kahmann R, Bolker M, Ma LJ, Brefort T, Saville BJ, Banuett F, Kronstad JW, Gold SE, Müller O *et al*: **Insights from the genome of the biotrophic fungal plant pathogen *Ustilago maydis*.** *Nature* 2006, **444**(7115):97-101.
- Laurie JD, Ali S, Linning R, Mannhaupt G, Wong P, Guldener U, Munsterkötter M, Moore R, Kahmann R, Bakkeren G *et al*: **Genome comparison of barley and maize smut fungi reveals targeted loss of RNA silencing components and species-specific presence of transposable elements.** *The Plant cell* 2012, **24**(5):1733-1745.
- Xu J, Saunders CW, Hu P, Grant RA, Boekhout T, Kuramae EE, Kronstad JW, Deangelis YM, Reeder NL, Johnstone KR *et al*: **Dandruff-associated *Malassezia* genomes reveal convergent and divergent virulence traits shared with plant and human fungal pathogens.** *Proceedings of the National Academy of Sciences of the United States of America* 2007, **104**(47):18730-18735.

9. Schirawski J, Mannhaupt G, Munch K, Brefort T, Schipper K, Doehlemann G, Di Stasio M, Rossel N, Mendoza-Mendoza A, Pester D *et al*: **Pathogenicity determinants in smut fungi revealed by genome comparison.** *Science* 2010, **330**(6010):1546-1548.
10. Sharma R, Mishra B, Runge F, Thines M: **Gene loss rather than gene gain is associated with a host jump from monocots to dicots in the smut fungus *Melanopsichium pennsylvanicum*.** *Genome biology and evolution* 2014.
11. Floudas D, Binder M, Riley R, Barry K, Blanchette RA, Henrissat B, Martinez AT, Otilar R, Spatafora JW, Yadav JS *et al*: **The Paleozoic origin of enzymatic lignin decomposition reconstructed from 31 fungal genomes.** *Science* 2012, **336**(6089):1715-1719.
12. Janbon G, Ormerod KL, Paulet D, Byrnes EJ, 3rd, Yadav V, Chatterjee G, Mullapudi N, Hon CC, Billmyre RB, Brunel F *et al*: **Analysis of the genome and transcriptome of *Cryptococcus neoformans* var. *grubii* reveals complex RNA expression and microevolution leading to virulence attenuation.** *PLoS genetics* 2014, **10**(4):e1004261.
13. Olson A, Aerts A, Asiegbu F, Belbahri L, Bouzid O, Broberg A, Canback B, Coutinho PM, Cullen D, Dalman K *et al*: **Insight into trade-off between wood decay and parasitism from the genome of a fungal forest pathogen.** *The New phytologist* 2012, **194**(4):1001-1013.
14. Martin F, Aerts A, Ahren D, Brun A, Danchin EG, Duchaussoy F, Gibon J, Kohler A, Lindquist E, Pereda V *et al*: **The genome of *Laccaria bicolor* provides insights into mycorrhizal symbiosis.** *Nature* 2008, **452**(7183):88-92.
15. Collins C, Keane TM, Turner DJ, O'Keefe G, Fitzpatrick DA, Doyle S: **Genomic and proteomic dissection of the ubiquitous plant pathogen, *Armillaria mellea*: toward a new infection model system.** *Journal of proteome research* 2013, **12**(6):2552-2570.
16. Stajich JE, Wilke SK, Ahren D, Au CH, Birren BW, Borodovsky M, Burns C, Canback B, Casselton LA, Cheng CK *et al*: **Insights into evolution of multicellular fungi from the assembled chromosomes of the mushroom *Coprinopsis cinerea* (*Coprinus cinereus*).** *Proceedings of the National Academy of Sciences of the United States of America* 2010, **107**(26):11889-11894.
17. Martinez D, Larrondo LF, Putnam N, Gelpke MD, Huang K, Chapman J, Helfenbein KG, Ramaiya P, Detter JC, Larimer F *et al*: **Genome sequence of the lignocellulose degrading fungus *Phanerochaete chrysosporium* strain RP78.** *Nature biotechnology* 2004, **22**(6):695-700.
18. Ohm RA, de Jong JF, Lugones LG, Aerts A, Kothe E, Stajich JE, de Vries RP, Record E, Levasseur A, Baker SE *et al*: **Genome sequence of the model mushroom *Schizophyllum commune*.** *Nature biotechnology* 2010, **28**(9):957-963.
19. Padamsee M, Kumar TK, Riley R, Binder M, Boyd A, Calvo AM, Furukawa K, Hesse C, Hohmann S, James TY *et al*: **The genome of the xerotolerant mold *Wallemia sebi* reveals adaptations to osmotic stress and suggests cryptic sexual reproduction.** *Fungal genetics and biology : FG & B* 2012, **49**(3):217-226.
20. Zajc J, Liu Y, Dai W, Yang Z, Hu J, Gostincar C, Gunde-Cimerman N: **Genome and transcriptome sequencing of the halophilic fungus *Wallemia ichthyophaga*: haloadaptations present and absent.** *BMC genomics* 2013, **14**:617.
21. Nierman WC, Pain A, Anderson MJ, Wortman JR, Kim HS, Arroyo J, Berriman M, Abe K, Archer DB, Bermejo C *et al*: **Genomic sequence of the pathogenic and allergenic filamentous fungus *Aspergillus fumigatus*.** *Nature* 2005, **438**(7071):1151-1156.
22. Goffeau A, Barrell BG, Bussey H, Davis RW, Dujon B, Feldmann H, Galibert F, Hoheisel JD, Jacq C, Johnston M *et al*: **Life with 6000 genes.** *Science* 1996, **274**(5287):546, 563-547.
23. Wood V, Gwilliam R, Rajandream MA, Lyne M, Lyne R, Stewart A, Sgouros J, Peat N, Hayles J, Baker S *et al*: **The genome sequence of *Schizosaccharomyces pombe*.** *Nature* 2002, **415**(6874):871-880.
24. Hane JK, Lowe RG, Solomon PS, Tan KC, Schoch CL, Spatafora JW, Crous PW, Kodira C, Birren BW, Galagan JE *et al*: **Dothideomycete plant interactions illuminated by genome sequencing and EST analysis of the wheat pathogen *Stagonospora nodorum*.** *The Plant cell* 2007, **19**(11):3347-3368.
25. Martinez D, Berka RM, Henrissat B, Saloheimo M, Arvas M, Baker SE, Chapman J, Chertkov O, Coutinho PM, Cullen D *et al*: **Genome sequencing and analysis of the biomass-degrading**



- fungus *Trichoderma reesei* (syn. *Hypocrea jecorina*).** *Nature biotechnology* 2008, **26**(5):553-560.
26. Dujon B, Sherman D, Fischer G, Durrens P, Casaregola S, Lafontaine I, De Montigny J, Marck C, Neuveglise C, Talla E *et al*: **Genome evolution in yeasts.** *Nature* 2004, **430**(6995):35-44.
  27. Galagan JE, Calvo SE, Cuomo C, Ma LJ, Wortman JR, Batzoglou S, Lee SI, Basturkmen M, Spevak CC, Clutterbuck J *et al*: **Sequencing of *Aspergillus nidulans* and comparative analysis with *A. fumigatus* and *A. oryzae*.** *Nature* 2005, **438**(7071):1105-1115.
  28. Jones T, Federspiel NA, Chibana H, Dungan J, Kalman S, Magee BB, Newport G, Thorstenson YR, Agabian N, Magee PT *et al*: **The diploid genome sequence of *Candida albicans*.** *Proceedings of the National Academy of Sciences of the United States of America* 2004, **101**(19):7329-7334.
  29. Pel HJ, de Winde JH, Archer DB, Dyer PS, Hofmann G, Schaap PJ, Turner G, de Vries RP, Albang R, Albermann K *et al*: **Genome sequencing and analysis of the versatile cell factory *Aspergillus niger* CBS 513.88.** *Nature biotechnology* 2007, **25**(2):221-231.
  30. Kellis M, Birren BW, Lander ES: **Proof and evolutionary analysis of ancient genome duplication in the yeast *Saccharomyces cerevisiae*.** *Nature* 2004, **428**(6983):617-624.
  31. Dietrich FS, Voegeli S, Brachat S, Lerch A, Gates K, Steiner S, Mohr C, Pohlmann R, Luedi P, Choi S *et al*: **The *Ashbya gossypii* genome as a tool for mapping the ancient *Saccharomyces cerevisiae* genome.** *Science* 2004, **304**(5668):304-307.
  32. Dean RA, Talbot NJ, Ebbole DJ, Farman ML, Mitchell TK, Orbach MJ, Thon M, Kulkarni R, Xu JR, Pan H *et al*: **The genome sequence of the rice blast fungus *Magnaporthe grisea*.** *Nature* 2005, **434**(7036):980-986.
  33. Galagan JE, Calvo SE, Borkovich KA, Selker EU, Read ND, Jaffe D, FitzHugh W, Ma LJ, Smirnov S, Purcell S *et al*: **The genome sequence of the filamentous fungus *Neurospora crassa*.** *Nature* 2003, **422**(6934):859-868.
  34. Ma LJ, Ibrahim AS, Skory C, Grabherr MG, Burger G, Butler M, Elias M, Idnurm A, Lang BF, Sone T *et al*: **Genomic analysis of the basal lineage fungus *Rhizopus oryzae* reveals a whole-genome duplication.** *PLoS genetics* 2009, **5**(7):e1000549.
