# Supplementary material for: The genome of the basal agaricomycete Xanthophyllomyces dendrorhous provides insights into the organization of its acetyl-CoA derived pathways and the evolution of Agaricomycotina
Source: PubMed Central journal article supplement (PMC4393869; doi:10.1186/s12864-015-1380-0), 2015-03-25
Supplement: 12864_2015_1380_MOESM2_ESM.pdf [file 12864_2015_1380_MOESM2_ESM.pdf]

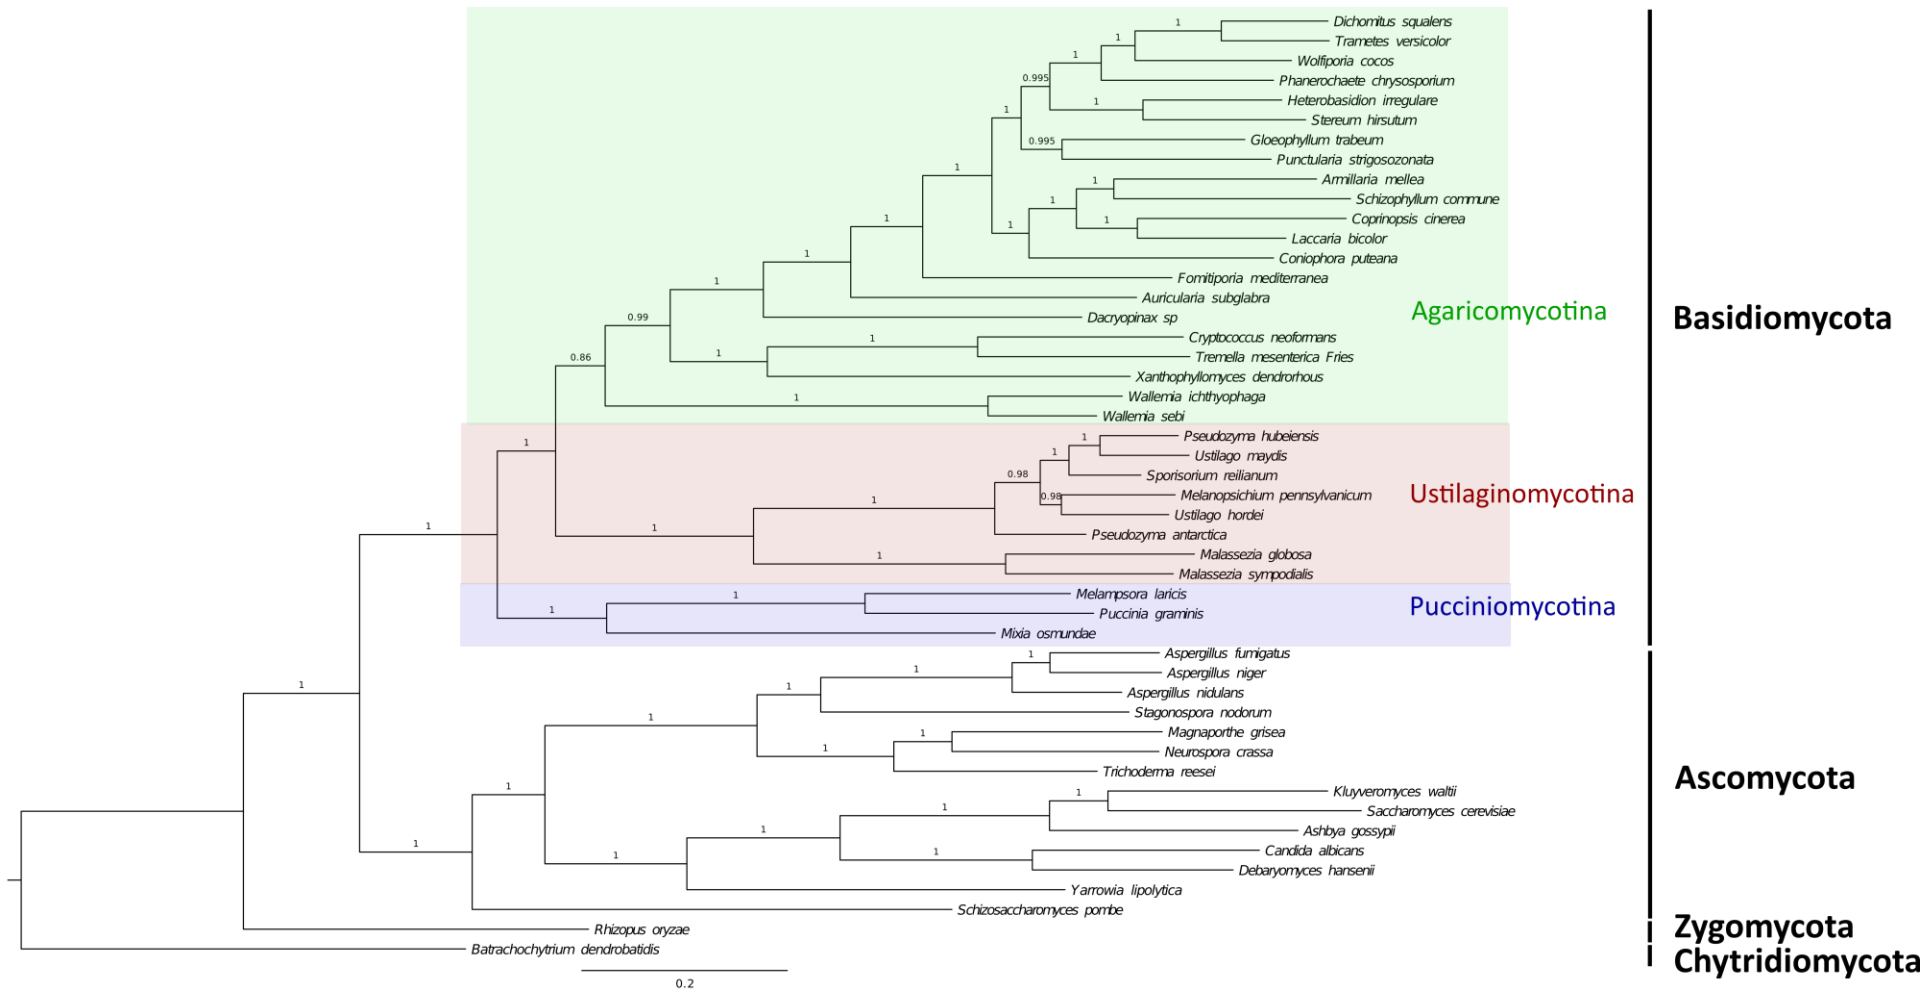

Supplementary Figure 2. Phylogenetic tree based on Bayesian phylogenetic inference. Numbers on branches denote posterior probabilities.
